# Supplementary material for: Thioredoxin shapes the C. elegans sensory response to Pseudomonas produced nitric oxide
Source: eLife journal article supplement (doi:10.7554/elife.36833), 2018-07-16
Supplement: supp [file elife-36833-supp-v1.zip]

Archive with 5 entries (5 files):
- elife_poa_e36833_Transparent_Reporting_File.pdf
- elife_poa_e36833_Figure_6_figure_supplement_1.pdf
- elife_poa_e36833_Figure_4_figure_supplement_1.pdf
- elife_poa_e36833_Figure_5_figure_supplement_1.pdf
- elife_poa_e36833_Figure_7_figure_supplement_1.pdf
