# Supplementary figures and images for: Thioredoxin shapes the C. elegans sensory response to Pseudomonas produced nitric oxide
Source: eLife journal article supplement (doi:10.7554/elife.36833), 2018-07-16

A

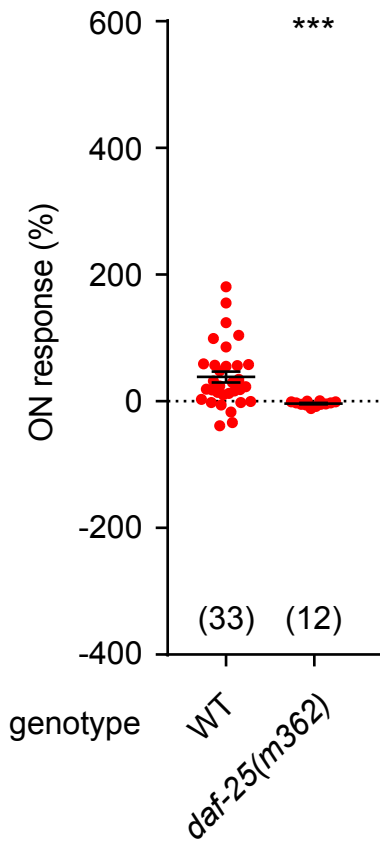

B

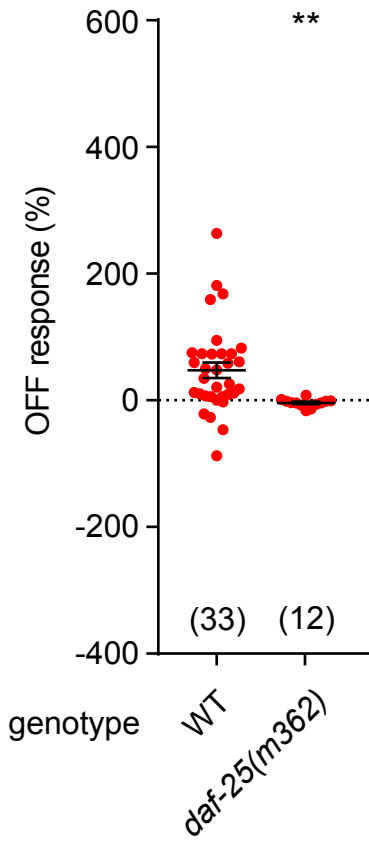

Figure 6 -supplement 1. Hao et al.

Supplement: supp [file elife-36833-supp-v1.zip › elife_poa_e36833_Figure_6_figure_supplement_1.pdf]

A

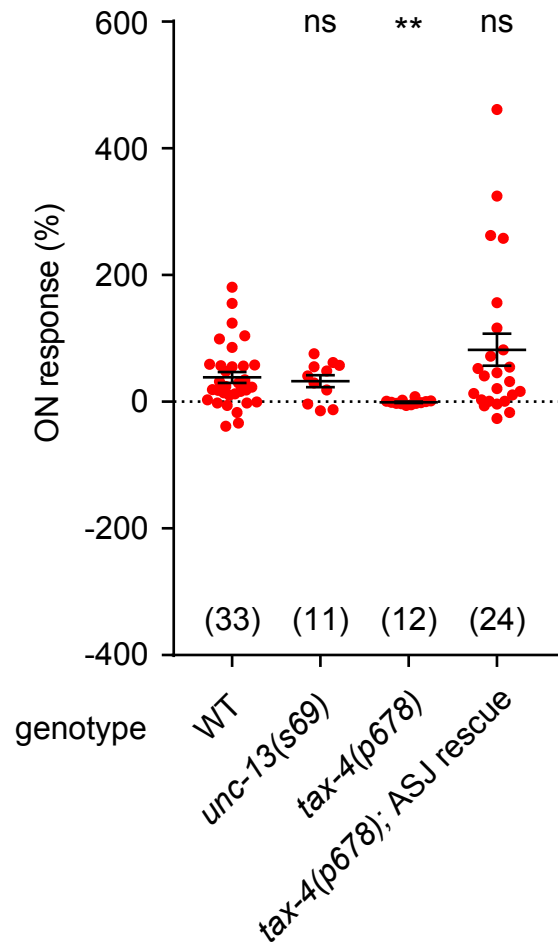

B

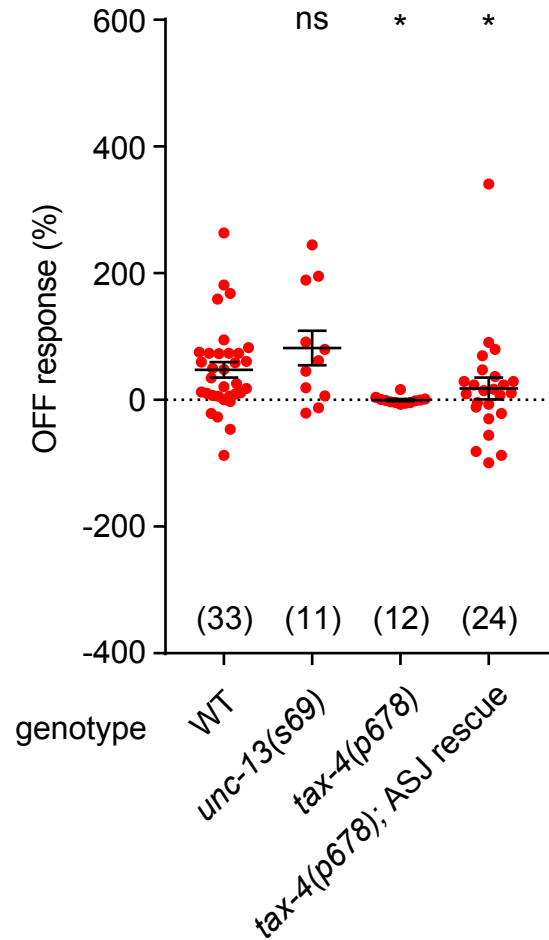

Figure 4 -supplement 1. Hao et al.

Supplement: supp [file elife-36833-supp-v1.zip › elife_poa_e36833_Figure_4_figure_supplement_1.pdf]

A

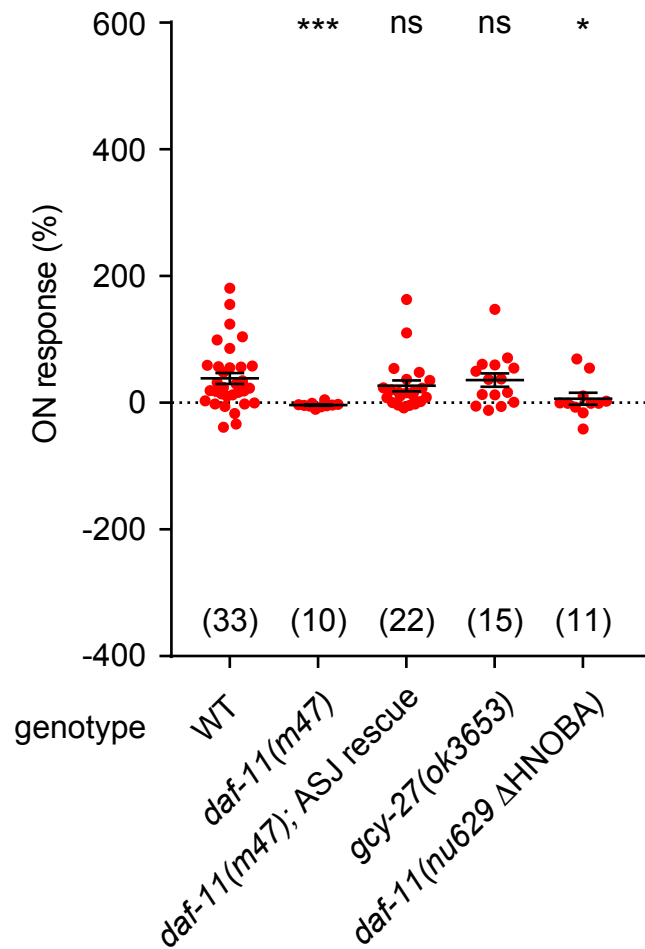

B

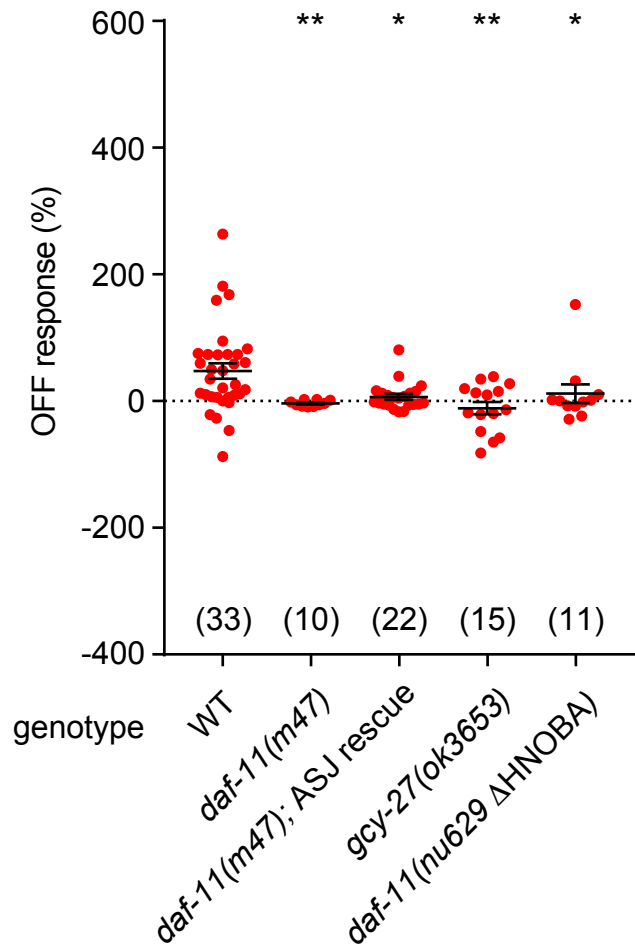

Figure 5 -supplement 1. Hao et al.

Supplement: supp [file elife-36833-supp-v1.zip › elife_poa_e36833_Figure_5_figure_supplement_1.pdf]

A

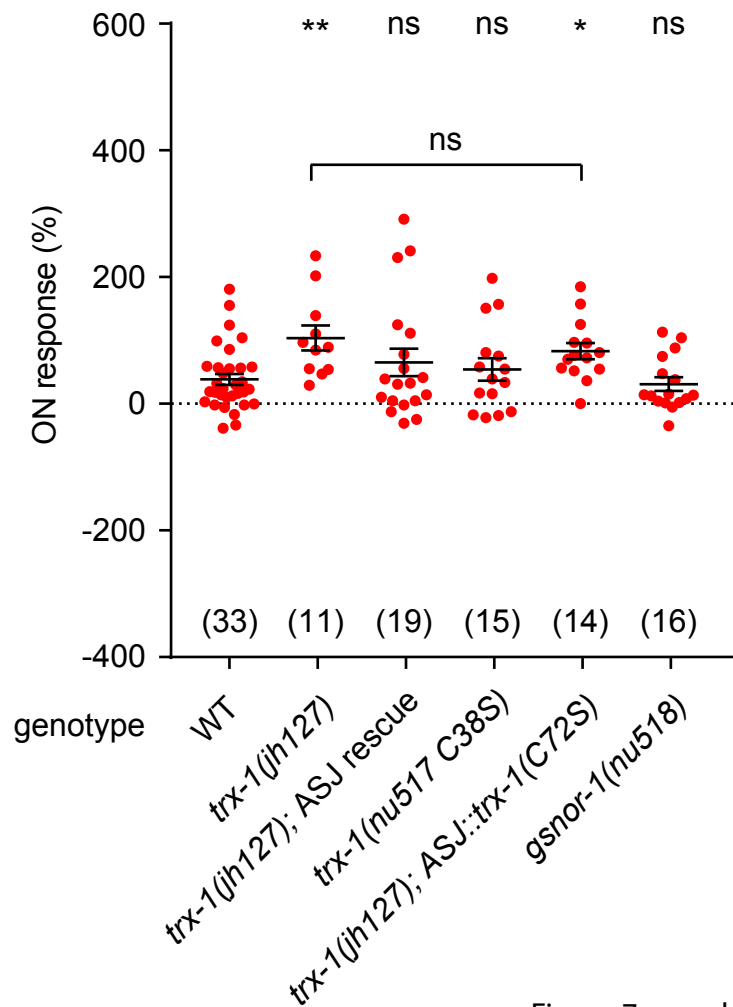

B

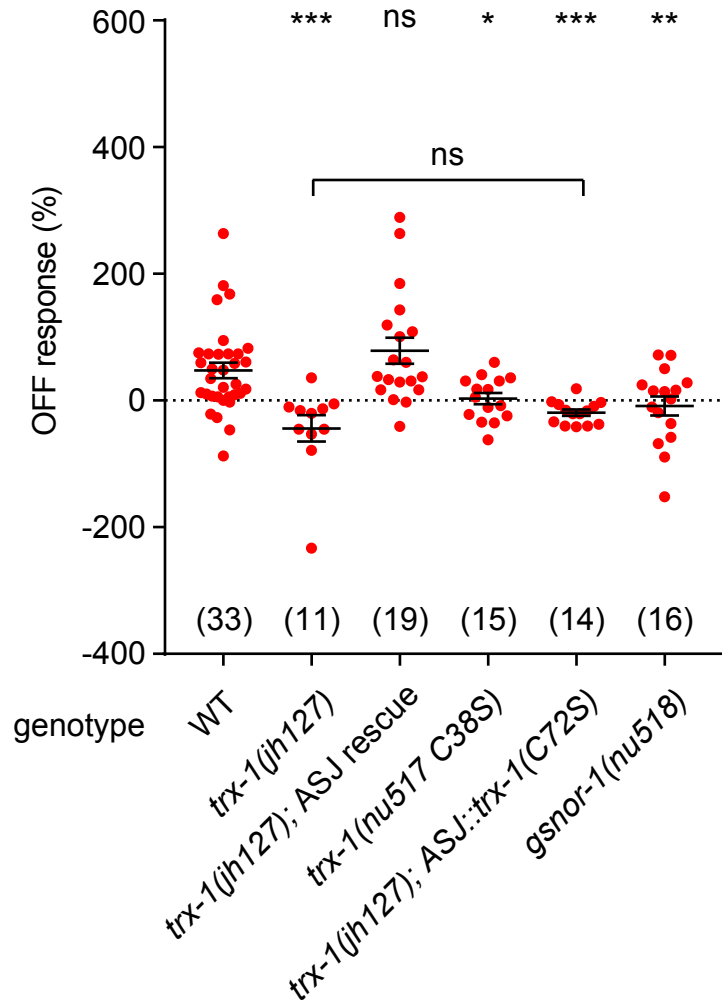

Figure 7 -supplement 1. Hao et al.

Supplement: supp [file elife-36833-supp-v1.zip › elife_poa_e36833_Figure_7_figure_supplement_1.pdf]
